# Supplementary material for: ECSIT Is a Critical Factor for Controlling Intestinal Homeostasis and Tumorigenesis through Regulating the Translation of YAP Protein
Source: Adv Sci (Weinh). 2023 Jul 6;10(25):2205180. doi: 10.1002/advs.202205180 (PMC10477885; doi:10.1002/advs.202205180)
Supplement: Supplementary file 2 — Supplemental Table 1 [file ADVS-10-2205180-s002.xlsx]

## Sheet: Yap program
YAP program signature
Gene
Lrp2
Flnc
Serpinb9b
Cryab
Ggta1
Serpinb6b
Plau
Ly6c1
Wnt7a
Lor
Btn1a1
Akap2
AF064781
P2rx2
Loxl4
Ildr2
Ctgf
Ly6g
Psca
6430531B16Rik
Krt80
Col4a1
BC067074
Ly6c2
Col4a2
Dab2
Ifi202b
Ehd2
Fam46b
Slc25a43
Amotl2
Pkhd1l1
Ankrd35
Synpo2l
Rassf8
Tigit
Htr1d
Gcnt1
Cyr61
Clic3
2610019F03Rik
Mtap6
Fgd3
Akap5
Ly6f
Wwc2
Gbp3
Rsad2
Gm10238
Rbpms
Schip1
Slc5a5
Dusp14
Zfp185
Magi2
Trpm8
39509
Usp18
Yap1
Il33
Tspan2
Apol9a
Adam8
Apol9b
Rassf8
Krt4
Msln
Gm17532
Sh3tc2
Tnni2
4933428G20Rik
Hpcal4
Ahnak2
Jub
Gm9747
Ly6a
Ifit3
Edn1
Arhgap23
A430105I19Rik
Nmnat2
Hepacam
Abca4
Isg15
Ifi44
Unc13d
I830012O16Rik
Lama5
Hspb1
Arhgap22
Mmp11
Ccdc80
Dntt
Mndal
Khdc1c
Syt8
Syde1
Vnn1
Mtap2
Cav2
Tinagl1
Plk2
Mras
Thbs1
Cxcl10
Slc12a4
Timp2
Serpinb9
Xaf1
Oas3
Emid2
Zfp37
Atp11a
Clca6
Bmp2
Ptrf
Mup5
Pak6
Wfdc2
Ier3
Ddx60
S100a3
Syt16
Rnf39
Gjb4
Akap12
Calcb
Oas2
Mx2
Gm16721
Phldb2
Apod
Tm4sf1
Enah
Stk32c
Rab40b
Tgtp2
Meis1
Irs1
Ano1
Aass
Tead4
Dok2
Epha2
A930004D18Rik
Ahnak
Anxa3
Myof
Klrg2
Klhl13
Spon1
Ptpn14
Nid1
Atp6v0a4
Cdkn1c
Creb5
Tgm1
Capn2
Bdnf
Pnlip
Enkur
Dlk2
Zbp1
Stx11
Dscam
Pmp22
Apol8
Nt5c1a
Rin3
Ifit1
Slfn5
Rtp4
Kbtbd10
1700056E22Rik
Anxa1
Aloxe3
Lats2
Ptchd3
Gjb5
Gm2783
Crip2
Arhgap40
D14Ertd668e
Syt14
Slc7a3
Tmem151a
Fabp3
Stbd1
Dynlt1e
4931428L18Rik
Lgsn
Plaur
Krt7
Pcolce
Jdp2
Clu
Dnm3
Tnnt2
Hdac7
Rbm24
Gm10972
Fosl1
Sorbs2
Dzip1l
Rnd1
Ildr1
Cnn2
Glis3
Sp100
Oasl2
Nrip3
Plat
Gm5431
Camk1
Dnahc2
Csrnp1
Ttll13
Serpinb6c
Camk1g
Samd4
Pld4
Dusp1
Myo1c
Ptprb
Bcam
Zfp57
Ifi203
Ppp1r2
Rnf208
Cd22
Ankrd29
Slc35e4
Gprc5a
Emp1
Tceal7
Gm17359
Fosb
Cish
Abcc5
Nt5e
Ptprt
Basp1
Tgm7
Chrnb1
2310007B03Rik
Hspa1a
Fn1
Atp2b2
Dscaml1
Gsg1
Foxn1
Lin7a
Glis2
Ripply3
Gm17244
Ptgs2
Flna
2310002L13Rik
Bex1
Aqp9
Npnt
Runx2
Mmp23
Lamc2
Mfap3l
Kcna1
Dpp6
Asprv1
Dse
S100a14
Amotl1
Pfn2
Pla2g7
4933427E11Rik
Yjefn3
Sprr2h
Sema3c
Ppp1r9a
Fam55c
Lamb2
Tmprss11f
Gngt2
Rab11fip5
Slc24a3
Slc35d3
Col9a3
Gm3200
Scara3
Ndrg4
Igtp
Prss23
1700019G06Rik
Lgals3
Syt12
Lhfpl2
Scrn1
Gm88
Lman1l
Gm17579
Adamtsl4
Dpcr1
Atp2a1
Slc5a6
Atf3
Ltbp4
9430020K01Rik
Arhgap29
Pcdh17
Gpr115
Frmd7
Msrb3
Oxct2b
Kifc3
Hspa1b
Smtnl2
Cntnap2
Arl4c
Ccdc68
Dusp9
Wwtr1
Glis3
Nhedc2
Trim69
2310002J15Rik
Xkr4
Epb4.1l4a
Id2
Tnfrsf12a
Gnat1
Arhgef17
Pdzk1ip1
Ston1
Pdlim2
Fam129a
Slc6a14
Trex2
Ptpn13
Fbxo24
Nr4a1
Jag2
Sprr2a2
Klk10
Cdhr1
Gm17237
Ryr1
Tmem136
Fgf13
Epn3
Rusc2
Hecw2
Gbp7
S1pr2
Omp
Ppp1r15a
Ttc9
Sh3bp5
Prkag3
Apon
Hephl1
Gbp2
Cd55
Id1
Nkpd1
Cdc42ep3
Rras2
Dhx58
Tceal1
Nhlh1
Trim30b
Fbxw10
Sprr2d
Rnf151
Btn2a2
Trim30b
St3gal2
Fam189a2
9930111J21Rik1
Kank2
Slc25a48
Lamb3
Tgfb2
Pcsk6
Ppp1r3d
Hs6st2
Slamf9
Clic4
Sertad4
Gadd45b
9930023K05Rik
Id3
Prnd
Cgnl1
Bmp8b
Tuft1
Sprr2a1
Sprr2b
Cidec
Rrad
Slc43a3
Lynx1
Klf4
Gna15
Tmem52
Mdfic
Il18rap
Abca12
Pim1
Itgb6
Klf6
Pard6b
Prss27
Ntng2
Atp6v1c2
Lca5l
Krt36
Pnck
Rasgrp3
Abhd2
Susd2
Macf1
Pear1
Sprr2a3
A330021E22Rik
Dusp3
E130012A19Rik
Gjb3
Me3
Fscn1
Vangl1
Krt18
Cxx1b
Il11
Gm17622
Prkcdbp
Hbegf
Herc6
Ppl
Trim30a
Tmem40
Myo15
Gja4
Lims2
Ntf5
S100a4
Dsg3
Dennd2c
Apobr
Ccdc102a
Syn1
Lpar3
Hoxa1
Acox2
Tspan6
Dusp10
Wtip
Slc44a2
Sez6l2
Shroom4
Hmox1
Wwc1
Ldhd
Litaf
Efna5
Rlbp1
Stx19
Fgf20
Gbp10
Hist1h3c
Sprr2e
Stab2
Ccdc89
Pip4k2a
Adamts15
Arhgap6
Trpm6
Cmpk2
1110012J17Rik
Mboat1
Pdgfc
Lmo7
Bicd1
Sgk2
St6gal1
Tsc22d2
Mcam
Ptpn21
Sh3tc1
Ldoc1l
Tm4sf4
Steap1
Otud1
Irgm2
Car2
Ifi27l1
Nbl1
Gm13695
Efhd1
Ccdc120
Tln2
Sprr2g
Car6
Gm5129
Myh11
Gm13283
Gm17664
2310014H01Rik
Palld
Zmynd15
Gas1
Cep170
Flnb
Isg20
Fam198b
Pmaip1
Tjp1
Pkhd1
Pik3cb
Smad9
Lrrfip1
Ttn
Gm7665
Arhgap44
Tcte2
Ccl20
Osbpl5
Fos
Pdgfb
Smad7
1700047I17Rik2
Rbms1
Acot9
Kcnq4
Mdga1
Tnfrsf9
Gm17391
Gm14440
Tgfb3
Gm13694
Dmrt2
Zmynd12
Gm10696
Eda
Ccdc40
Tnni1
Gabrr2
Kcnv2
A230065N10Rik
Gm10129
Capn5
Gm7008
Tulp2
Rab3b
Slco2a1
Steap2
Phlda1
Crlf3
Agtpbp1
Prrg4
Flot2
Artn
Emp2
Grasp
Clcf1
S100a11
Vgll3
Rapgef2
Prokr1
Rasgef1b
Nlrp10
Slc7a11
6030419C18Rik
Cxcl16
Tead1
Adamts1
Ahrr
2210011C24Rik
Naalad2
Zmynd10
Hist1h2bg
Porcn
Samd9l
Ngfrap1
9530077C05Rik
1700069B07Rik
Car5b
Ubtd2
Pwwp2b
Rin1
Gm3625
Wnt16
Tmem150c
B230317F23Rik
Eno4
Gm13696
BC022687
Nceh1
Socs1
Oas1a
Aqp7
Tspan4
Maff
Gpr124
9030425E11Rik
Plec
Frmd4b
Tpm2
Tmem231
Serp2
Sod3
Rhod
Ncrna00085
Snai3
Arnt2
Gm7461
39691
Gem
Spire1
Lama3
Olfr56
Dusp18
Ddah1
2010002M12Rik
S100a6
Fam123a
Reep2
Dnahc7b
Kcnu1
Tnfrsf22
1110002E22Rik
Neu1
Epha4
5330426P16Rik
Eid2
Zbtb10
Asap1
Gpx7
Arid3a
Grb10
Lamc1
Il28ra
Phlda2
Pam
Fam43a
Egfr
Tmem130
Tlr4
Epha3
Gm17343
Kcnk7
Gm106
Rnf17
Gm17379
D830030K20Rik
Espnl
Gm12824
Lrrn4cl
Slc22a27
Efna5
Slc22a28
Islr2
Chrna1
Gm14305
Ccrn4l
Arf2
Rnf213
Sprr1a
Rai14
Rhof
Hsd3b3
Icam1
Prkcc
Irf7
Rtn4r
Arhgef10
Ccdc85b
Fcho1
Hrh1
Morn4
Elk3
Myadm
Arc
Otud7b
Fam59a
Ifrd1
Tagln2
Acot10
Tbc1d2
Osbpl3
Gm10393
Aph1c
Tgfbr2
Gpr64
6030419C18Rik
Oas1b
4930572J05Rik
Cdh16
Mettl7b
K230010J24Rik
Gm10691
Gm14446
Arid5a
Murc
Bcl2l1
St6galnac4
1700019L03Rik
Ifit2
Glipr1
Jam2
Il17re
Mapk11
Syne1
Anln
Ssh1
Mycbpap
6030445D17Rik
F2r
Pla2g15
Parp12
Angptl3
Raph1
Cnksr1
Tgfb1i1
4933427G17Rik
Alppl2
Eps8l1
Krtap4-16
Fsip1
Cd101
A930002H24Rik
Zcchc18
Tg
Serpinb8
Nkain3
Rab33a
Fscn2
Armcx4
Klf2
Fam65a
F3
Dst
Oas1g
Pxmp2
Tnks1bp1
Myo1h
Endod1
1700016K19Rik
Rasl11a
Kctd10
Gpc1
Zfp385b
Actb
Abl2
Stk30
Pvr
Gm17590
1110032A04Rik
Tnfrsf21
Crym
Tmem43
Slc38a3
1810062G17Rik
Gm14306
Tmem188
Ptrh1
Efha2
Rassf1
Chac1
Nek8
Hspb9
Dusp13
Thsd7a
Ccdc64
Arhgap21
Kctd11
Trim6
Adm2
Lhfpl4
Krt1
Tubb2a
AA986860
Rdm1
Npff
2010109I03Rik
Pacsin2
Ehd1
Diap3
Capn13
Plekhg3
Msh5
Tnfrsf10b
Strn3
Ccdc112
Nudt17
H2-T24
Trip6
Sh3pxd2a
Glis1
Sfta2
Rab39b
Zfp105
Enpp3
Lmna
Casc1
Trim34b
Krt14
Wls
Cdc42se2
Tmem71
Gsn
Fam83h
Cbln3
Ppp1r13l
Fez2
Oasl1
Rnf180
Adk
Trib3
Hpse
Rab34
Cldn4
Gpr17
Aim1
Greb1l
Thsd4
Mycn
Tpst2
Ctsl
Slc17a8
Krt23
Baiap2
F2rl1
1700019B03Rik
1700013N18Rik
Zfp651
Pacsin3
1700001J11Rik
Gm3002
Irx2
Nanp
Vnn3
Cd59b
E230008N13Rik
Hist2h2bb
Rpl26-ps2
Acoxl
9130014G24Rik
Olfm2
Gm10414
Foxd3
Gm8898
Vmn2r29
2810055G20Rik
Cxcr4
Col4a4
Lmtk3
Slfn2
Kazn
Cwh43
Anxa5
Prkx
Mospd2
Tmem62
Krt19
Scnn1a
Prkci
Gprin1
Akr1b8
Myo1e
Areg
Krt16
Tnfrsf22
Krt9
9930012K11Rik
Krt8
Krt17
Dusp8
Pdp1
Rasl11b
Agpat4
Loxl2
Far1
Fam38a
Pmepa1
Ap3m2
Lrrc8e
Sfxn3
Zfp568
Gm15319
Stx2
Fbxw17
Ezr
5730528L13Rik
Slc31a2
Gadd45a
Runx1
Celf2
Susd1
Pip5k1a
Tmem140
Shb
C330046G03Rik
Dusp6
Pitpnm3
Pim3
Ddx58
Mtap4
Fam160a1
2900073G15Rik
Gpt2
Rdh16
Gng2
Krt42
Anxa8
Agrn
Plcd3
Psg25
Lypd6
1700012L04Rik
Als2cr4
Slc22a23
Pdzk1
Camkk1
Ptar1
Ttll1
Tspan9
Gm10463
Pcyt1a
Tln1
Sqstm1
2810474O19Rik
Fam131c
Eng
Gm5481
Gm17511
Nbea
Cdipt
Pgap1
1810048J11Rik
Spnb5
Mrc1
Serpinh1
Lepre1
Dusp8
Uap1l1
Lpcat2
Itgax
Vpreb1
Slc25a4
Crim1
Fam107b
Qk
Sbno2
Pparg
Sash1
Renbp
Sh3rf2
Coq10b
3830403N18Rik
Zbtb16
Pcp4
Gna14
4732456N10Rik
Kif17
Arl5c
Gm6658
Olfml3
1700011A15Rik
Cabyr
Coch
Zfp583
Rbpjl
Rnase6
Kcnrg
Hist2h2aa1
Ptprq
Fam65c
S100z
Klhdc7a
Svep1
Anxa2
Trim15
Suox
Atxn10
Abcg2
Dusp5
Epb4.1l1
Gas8
Cyp4b1
Rims3
Sned1
Ereg
Eml2
4921536K21Rik
Ccdc162
Pde6g
Ntn3
Sgtb
Nxf7
Psat1
Serpinb5
Rap2b
Slc16a8
Maml2
Bmp8a
B430305J03Rik
Cyp1a1
Ctnnal1
Cd160
Catsper4
Hsd17b2
Cbfa2t3
Gm527
2310028H24Rik
Stk10
Tspyl3
Sult4a1
Rasip1
BC048507
Glt28d2
Ap1s2
Dsp
Nap1l3
Ift81
Grm4
Sdcbp2
Fam101b
Cacnb3
AW011738
Tor1aip1
Mum1l1
Gm10657
Abhd12
Camsap2
Ttc22
Pbx4
Gsdmd
Usp46
Egr1
Pomc
1700084J12Rik
Tbx3
Esyt2
Stx1a
Ccdc164
S100a16
Gm7334
Mmp14
Slc25a24
Plekhm3
Cyb5r2
Fetub
Plcd1
Smpdl3a
Il34
Rhob
Mafk
2810008M24Rik
Sertad1
Gm10604
Kif5a
Cdh11
Zfp248
Cfl2
Abcc1
Dennd5a
Cgn
Gm6096
Bst2
2010109K11Rik
Zdhhc8
Il3ra
Itpripl2
Plekhg2
Cdon
Vstm2l
Agps
Tns4
F11r
Ddhd1
Junb
Myh14
Pdlim7
Gdf15
Gas2l3
Afap1
Mmp24
Gm98
Slc4a11
Syt17
Mal
4930402H24Rik
Pias3
Tmem125
Mark4
St3gal6
Arhgap8
Arhgef18
Slc23a3
Wdr47
Spnb1
Tchh
Tacstd2
Samd5
Aim1l
Dtnb
Pik3cd
Cdkl5
Myo15b
Rasl10b
Hspa12b
Chrm4
Gm4793
Proca1
Cidea
Tmem30c
Hoxb9
Slc6a13
Cabp4
Wdr52
Lipc
1700022P22Rik
Aox3l1
Rab44
Cyp4a32
Xrra1
Lbx2
Gm6724
Ttll8
Phkg1
Gm8225
St3gal5
Lst1
Gm12185
Cd226
F2rl3
Cldn6
Wfdc3
Srms
Clca5
Ptgis
Abhd16b
Wdr63
St6gal2
Prss35
Gm2897
Il6
Gm14436
Syngr3
Angptl6
4930548H24Rik
Pga5
D830014E11Rik
Gm14862
Shh
6030408B16Rik
Btg3
Esr2
Dub2a
Sprr2i
Gm4955
Pydc4
C1qtnf4
Dusp27
Tgfbr3
6330512M04Rik
Otop2
4930595D18Rik
Gm8991
Myh7
Ninl
Metrnl
Rnf19a
Kif3a
Nfil3
Rhbdf1
Csf1
Slc44a4
1600029D21Rik
Fam82a1
2610018G03Rik
Zfp296
Sybu
Efhd2
P2ry2
Timp3
Edn3
Lrrc27
Man2b2
Tmem2
Gm16066
Tada3
Paqr8
4930539E08Rik
Dlgap1
Ptpn12
Efhc1
Tpm4
Itgav
Nipal1
3110062M04Rik
Gldc
Gch1
Fam46d
Cryz
Trib1
Mamld1
Arl8a
AW555464
Gm13691
Gm11102
Jun
Tmem184c
Capsl
Itpripl2
Trim16
Sik3
Atg16l2
Slc9a2
Gm9887
Eif4ebp1
Flrt3
Lrrc46
Mkrn3
Adm
Eif2s2
Slc45a3
Kdm3b
Pea15a
S100a10
Trio
Bcor
Krt84
Igfbp3
Bicd2
Vdac2
Abca5
Rp2h
Hist1h1e
Ift57
Impdh1
Slc7a5
Rras
Kctd9
Pkp3
Gm7854
Actn4
Dtx1
Gnb5
Aqp5
Chst3
Itgb4
Igf1r
Erc2
Ikzf4
4930500M09Rik
Sdc2
Ddah2
Mllt4
Hs3st1
Blnk
Camk2a
Fam176b
Anxa6
Ap1s3
Psd3
Cd276
Hsh2d
Tnk2
Zfp385a
Ltbp3
Jrk
Flrt3
BC125332
Parva
Cd2ap
Gm17438
Ncoa3
Derl3
Chka
Luzp1
Ppfibp1
Taf9b
Tmem171
Slc2a4
Nacad
Gm14327
Lgals7
Styx
Sdc3
Sh3bp4
Anxa7
Mtap7d1
Tnfaip1
D15Ertd621e
Inf2
Tmsb10
Lrfn4
Rnf133
Bcar1
Ptpn23
Mab21l3
Srgap1
Smurf1
Jph1
Actn3
Pcdha11
Htra1
Rab23
Cxcr7
Slc9a4
Nsf
Tnrc18
Als2cl
Eif4e3
Prmt2
Mesdc1
Tubb2b
Fggy
Gm10306
Lrrtm2
Esyt1
Nxnl2
Myh9
Ltk
2310016C08Rik
Mvp
4930562F07Rik
Ccnd1
B4galt2
Gm10020
Ddit3
Ttll7
Myo9a
8430427H17Rik
Sh3pxd2b
Hoxb6
Tle6
Zfand2a
Csgalnact2
Egf
Xk
Igsf9
Stc2
Emp3
Dmwd
Plekhh3
Gm3252
39698
Pygm
Gm6788
Actn1
Fbxo6
Tpm1
Ly6e
Ier5
Rai1
Mdfi
Gm14137
Mtap1s
AI747448
Hist2h4
Nepn
Gml
Gm128
C1qtnf5
Zfp872
I830134H01Rik
Hist1h1b
Cldn8
Hic1
Fbln5
Zglp1
Krt6b
Arhgap28
Gm5449
Plxna4
Elf5
Chrne
Dtna
Taar9
Gm10399
Ctsw
Scel
Cpeb1
Thbs4
Epgn
Txk
Sgcb
Gm13697
Gm12689
Il17c
Pcdhb18
Icam5
Casr
E130304I02Rik
8430432A02Rik
Gm336
4933433C11Rik
Cd80
Ehd4
Lrrc58
Hic2
Akap13
Baz1a
Gabbr1
Plin2
Thnsl1
Cdk6
Epb4.1l2
Arid5b
Hlcs
Pag1
Plxna1
AK129341
Arhgef5
Meis3
Trp53tg5
Rnf13
Mbp
Fosl2
Cd52
Slc25a33
Ina
Ikbip
Fkbp9
Nrp2
Prkcd
9130017N09Rik
Traf4
Fstl3
Tnfaip3
Pstpip1
Cpne3
Sh3bgr
Tlr5
Has3
Pgap2
Nfkb2
Spns3
Trim46
0610010F05Rik
Fbxw4
5730508B09Rik
Gm17541
Ppp1r12a
Zfhx3
Podxl
Mthfd2
Epdr1
Mtmr10
Trpv4
Zfp951
Ccdc109b
Rcan3
Abi3
Spsb2
Aspa
Fads3
D930007J09Rik
Nab1
Tax1bp3
Krt222
Irx4
Tcea2
Mprip
Nt5dc3
Pkp4
Gm14322
Ncs1
Otub2
Fhit
Epb4.1l5
Myo5a
Tacc2
Cltb
5430407P10Rik
Slc10a2
Plcxd2
Slc3a2
Sema3b
Rhpn2
Dnajc5
Clip1
Chmp2b
Apold1
BC051019
Lta
Gm996
Aif1
Casp14
Krt78
Olfr1393
Lypd3
Clec4a1
Gm6498
A430110N23Rik
Ablim1
Bcl3
Zcchc10
Samd4b
Hspa5
Cep350
Ryk
Irf9
39701
Prl2c3
1500003O03Rik
Large
Inpp1
Serpinb1a
Wsb2
Capn12
Tctex1d2
Pgap1
Cd46
Fam188a
BC006779
C530008M17Rik
BC029214
Rps4y2
1700034J05Rik
Klc1
Med13
Snta1
Gnai1
Hist1h2ae
Dzip1
Sycn
Chn2
Ifi47
Trpc1
Npc1
BC025446
Dusp4
Ifih1
Foxa1
Plekhf2
Fgfr3
Ppm1k
Tesk2
Tulp3
Ptprj
Pcx
Cep290
Rilpl1
Cxcl9
Tekt5
Wdr78
Pnma1
Krt77
Gpd2
Fam129b
Srp54a
Ptpn9
Notch2
Gm11067
Sqrdl
Midn
Rhbdd1
Socs5
Lipo2
Adcy9
Aak1
Slc29a2
Htra3
Adrb2
Dmrta2
Inadl
Rasgrf2
Asb1
Spire2
Slc8a3
Tmtc2
3110070M22Rik
Dsg2
Usp54
Bbs4
Ctnna1
Ascc3
Kitl
Lpcat4
Taok3
Mxd1
Thbs3
Ptprcap
Hist3h2ba
Cspg5
Mical3
Gm9938
Usp11
Fam84a
Fam69b
Sult2b1
Nyx
Wdr35
A230050P20Rik
Gars
Fgfr4
Rnh1
Cyp2w1
Clmn
BC048546
Nedd4l
Plek2
Nipa1
Gm11175
Socs6
Il4i1
Prss57
Csf2ra
Rdh10
Cldn25
1110007C09Rik
Ubash3b
Xiap
Adcy4
Pycr1
Mfsd7c
Rfx2
Cd97
Nbeal2
Slc39a13
Slc26a11
Map3k3
Nefh
Pvrl2
0610007L01Rik
Limk1
Tanc1
Tceal8
Zfp772
Creb3
Glt8d2
Ttc7b
Rnd3
Dcbld2
Zan
Map4k5
Impact
Parp14
Ak7
B230312A22Rik
Rabgef1
Pdcd6ip
Lmo4
Gm5453
Vps13a
Avil
Amz1
Jmjd1c
Hsd3b2
1700001C19Rik
Errfi1
Hsp90aa1
Spr-ps1
Xlr3b
Ogg1
Dock11
Osbpl1a
Rock2
Dbndd2
Snap47
Hspbap1
Cln8
Cdr2l
Tns3
Hpgd
Magi3
Itpkb
Kctd3
Mtap
Eno3
Hist1h1d
Arl6ip5
Avpi1
Mpzl3
Car13
Ppap2b
Dgka
Jund
Nradd
Sema6a
Glipr2
4930455F23Rik
Srgap2
Eps8l2
Pml
Specc1
Trim13
1300014I06Rik
Slc9a3r1
Coro1c
Stoml1
Kremen2
Ifngr1
Capg
Dbndd2
Gm10518
Eif5a2
Stat1
Rtn4
Bach2
Ube2l6
Rgs19
Mgat4c
Clcn5
Mtm1
Frat2
Zfp189
Kctd7
4930523C07Rik
Rab31
4921524J17Rik
Pak2
Mthfr
Adap1
Dok4
Tes
Asah1
Stat2
Abcc3
Muc1
B230216G23Rik
Zp1
Efhb
Tuba3a
Pla2g4f
Zfp354c
Asb14
Ccdc37
Serpina1e
Gm7932
Upk1a
Pcdhb15
4930428E23Rik
Gsdmc4
Gm5414
Gm10731
Hist1h2ac
Sh2d4b
Atp5l-ps1
Ccdc103
BC055111
Vma21-ps
Arhgef15
Rpl30-ps8
Car11
Arhgef33
Ranbp17
Pmfbp1
Gm12033
Amy1
Crtam
Apbb1
Spink5
Tat
Mmrn2
4932412H11Rik
Qrich2
Gm8112
Calca
Mapk15
Arhgef9
Snai1
Lef1
Ptpdc1
4933405L10Rik
Gm2237
Gast
Gm2026
Gm10313
Acot5
H2-Eb1
Cntfr
Hoxb2
Irak1bp1
Gm17527
Lass3
Xkr6
Myo16
E230025N22Rik
Hist2h2aa2
P2rx5
Gdap1l1
Cldn27
4932415D10Rik
Slc28a2
Coro6
Kcmf1
Mfrp
Gm6189
Cnga1
Gm14124
Pcbp3
Trim43a
Srsf12
Gpc3
Elavl3
Ccdc74a
Hgd
Irx3
Csf2rb
Lrrn4
Mesp1
Prr7
Cecr2
Cmtm3
Hist1h2ad
Robo3
Mpdz
Pkd2l1
Prdm2
Il1rn
Arhgap17
Slc7a1
Ripk3
Tctn1
Tmem131
Sgk3
Prr13
Atf5
Actg1
Eps8
Tmem144
Pcgf5
Smg7
Gnai2
Ctbs
Hpcal1
Ywhag
Stxbp6
Calu
Cdkl3
Sat1
Mpp1
Exoc6b
Trim47
Sik2
Tbl1x
Card10
C130074G19Rik
Herc3
Srp54b
Ankrd44
Lrba
Mlf2
Mtap9
B4galt1
Gpr151
Clic1
4833442J19Rik
Fzd7
1110067D22Rik
Ddx47
Ric8
Rps19-ps4
Bbs5
Snx16
Fam161b
Ccdc78
Phldb3
Sfn
Ppic
Ect2
Ccdc104
Ccng2
Tor1aip2
Adar
Mpv17l
Arhgdig
BC030499
Acap3
Lca5
Gm10277
Gm340
Eif6
Slc5a10
Zdhhc18
Cdkl2
Asns
Grhl1
Wdr26
Mapk12
Adora2a
Fam89a
Tbc1d10b
Serpinb1c
Il1rap
Plekhn1
Smad6
Hivep2
Polr3d
Krt83
Slc38a7
Rnf148
Fam164a
Vopp1
Nt5c2
Ercc1
Gm10643
Tjap1
Gm7353
Gm10974
Zswim6
Tspan15
Pde3b
Zc3h3
1700030J22Rik
Ldlrap1
Akirin2
Rab11fip2
Eif3c
Igsf3
Cttn
Btc
Gtpbp2
Sacs
Flii
Uba7
Slc39a6
Cnn3
Fam13b
Myo1d
2410089E03Rik
Stat3
Sh2d4a
Prkce
Gm17239
Hspa8
Adamtsl5
Gpr19
Eif2b3
Gm5884
Diap2
Ctsf
Tnnc1
Tnnc1
0610009L18Rik
Rdx
Agxt
Usp53
Unc5b
Xpr1
S100a13
Sh3d19
Csf1r
Slk
Ncoa7
Zfp295
Spnb2
Klhl22
Wsb1
BC021614
Itga3
4930578N16Rik
Cdcp1
39697
Gm2058
Tbc1d25
Trim25
Tpm3-rs7
Cdkn1a
Slc39a10
Habp4
Lims1
Perp
Zfp593
Plekhm2
D17H6S56E-3
Abcg4
Sepn1
Dhh
Bhlhb9
Fgf15
Rell1
Aff4
Hras1
Cpox
Krt15
Nrp1
Obfc1
Plce1
Piwil2
Myom1
Rhov
Rg9mtd2
Il6st
Rps6kl1
Cebpb
Csnk1e
Hax1
Wdfy2
Krt20
Sv2a
Trpv3
Agfg1
Eaf1
Ostf1
[truncated: 4,167 more rows]

## Sheet: Revival Stem Cell
Revival Stem Cell signature
Gene
S100a6
Clu
Ly6a
S100a11
Ly6d
Sprr2a3
Mif
Krt19
Krt7
Npm1
Krt18
Rps12-ps3
Fxyd3
Xcl1
Anxa2
Ccnd1
Ncl
Ccnd2
Cd44
Ptma
Anxa3
Lmna
Ranbp1
Rplp0
Rpl29
Nme1
Ran
Gm10073
Rpl35
Dynll1
Sprr1a
Rps2
Rps12
Anxa1
Rps27l
Erh
Gm10076
Rplp1
Pglyrp1
Rps28
Nhp2
Snrpg
Rps26
Gm8730
Sat1
Eif2s2
Wdr89
Hsp90ab1
Rpl41
Rpl27

## Sheet: BIOCARTA_EIF_PATHWAY
BIOCARTA_EIF_PATHWAY
EEF2
EEF2K
EIF1
EIF1AX
EIF2S1
EIF2S2
EIF2S3
EIF3A
EIF4A1
EIF4A2
EIF4E
EIF4G1
EIF4G2
EIF4G3
EIF5
EIF6
