# Supplementary material for: ECSIT Is a Critical Factor for Controlling Intestinal Homeostasis and Tumorigenesis through Regulating the Translation of YAP Protein
Source: Adv Sci (Weinh). 2023 Jul 6;10(25):2205180. doi: 10.1002/advs.202205180 (PMC10477885; doi:10.1002/advs.202205180)
Supplement: Supplementary file 3 — Supplemental Table 2 [file ADVS-10-2205180-s003.xlsx]

## Sheet: Mean
id	MS2 name	Formula	Monoisotopic Molecular Weight	MS2 ppm	MS2 score	MS1 name	MS1 ppm	KEGG ID	Molecular Weight	RT [min]	WT1_si	WT2_si	WT3_si	WT4_si	WT5_si	Mean WT_si	WT1_co	WT2_co	WT3_co	WT4_co	WT5_co	Mean WT_co	KO1_si	KO2_si	KO3_si	KO4_si	KO5_si	Mean KO_si	KO1_co	KO2_co	KO3_co	KO4_co	KO5_co	Mean KO_co	QC-1	QC-2	QC-3	QC-4	Mean QC
1	1-Methylhistamine		100	0	100		0		126.1	10.1	183.486	235.837	259.956	123.363	183.288	197.186	754.789	1874.35	837.563	284.698	667.954	883.87	149.04	204.589	401.33	233.979	243.697	246.527	1176.17	612.565	886.139	731.429	1362.96	953.852	71900	64900	64500	73000	68575
2	2-Aminoadipate		101	0	100		0		160.1	12	1628.44	1870.88	581.858	1643.13	517.52	1248.37	7892.72	7225.13	2710.66	4377.22	6525.1	5746.17	12757.4	11395.8	22394.7	13099.9	15846.3	15098.8	28497.4	18481.7	14554.5	18628.6	10963	18225	482000	444000	605000	523000	513500
3	2-Aminoisobutyric acid		102	0	100		0		104.1	11.7	13990.8	24374.2	9435.84	18356.9	22372	17705.9	26436.8	32931.9	20761.4	31814.9	21467.2	26682.5	50785.3	55831.7	90465.6	49627.4	50660.3	59474.1	180311	175393	91089.1	211429	89629.6	149570	2490000	2290000	2030000	2620000	2357500
4	2'-Deoxyadenosine		103	0	100		0		252.1	4.04	902.523	619.236	649.336	1211.81	439.353	764.452	632.184	979.058	1598.98	1064.06	513.514	957.559	605.585	959.847	758.315	707.899	986.795	803.688	911.917	1089.01	1133.66	1891.43	911.111	1187.43	42800	40000	41400	41400	41400
5	2'-Deoxycytidine		104	0	100		0		228.1	6.01	391.055	625.823	295.354	582.798	144.205	407.847	3701.15	1842.93	3563.45	2829.18	3706.56	3128.66	1340.31	1346.08	1042.13	867.362	1236.49	1166.48	10000	2680.63	1321.78	2714.29	2037.04	3750.75	79500	66200	72600	69900	72050
6	2'-Deoxyuridine		105	0	100		0		229.1	5.01	1422.02	1488.8	1559.73	1202.82	2506.74	1636.02	4022.99	5863.87	7817.26	4448.4	5289.58	5488.42	1815.01	2447.42	2017.74	1439.64	877.551	1719.47	4756.48	6178.01	2668.32	5828.57	9259.26	5738.13	116000	134000	114000	144000	127000
7	2-Hydroxy-2-methylbutyric acid		106	0	100		0		119.1	10.8	275.229	358.366	330.752	335.045	431.267	346.132	754.789	643.979	705.584	398.577	760.618	652.709	493.892	397.706	472.284	572.28	409.364	469.105	442.487	811.518	871.287	731.429	792.593	729.863	25100	21300	20800	28300	23875
8	3-Hydroxyanthranilic acid		107	0	100		0		154	10.9	364679	478261	326327	446727	423181	407835	1.12261e+06	1.40314e+06	1.26904e+06	1.04626e+06	1.19691e+06	1.20759e+06	619546	554493	662971	533532	392557	552620	922280	1.18848e+06	841584	1.17143e+06	1.20741e+06	1.06624e+06	32900000	34100000	33900000	33000000	33475000
9	3-Nitrotyrosine		108	0	100		0		227.1	12.4	581.422	625.823	513.274	531.451	402.965	530.987	1716.48	696.335	1137.06	854.093	884.17	1057.63	3019.2	1648.18	4146.34	2369.6	1764.71	2589.61	4176.17	5235.6	1613.86	6400	3081.48	4101.42	131000	136300	107000	124600	124725
10	3-Phosphoglycerate		109	0	100		0		185	10.8	85.6651	84.3215	26.5487	54.8139	57.5472	61.7793	204.598	335.079	203.046	151.957	226.641	224.264	149.04	142.83	59.2018	79.5827	41.6567	94.4622	179.793	307.33	132.178	274.286	237.037	226.125	21300	25600	22400	19200	22125
11	4-Hydroxy-3-methoxyphenylglycol		110	0	100		0		183.1	12.6	6.11239	14.0975	23.6726	6.84211	14.4205	13.029	40.9962	56.0209	27.0558	38.0783	41.3127	40.6928	27.9232	30.5927	23.7251	23.845	12.8451	23.7862	55.4404	27.9058	52.9703	91.4286	197.778	85.1046	1130	1070	1070	1070	1085
12	4-Hydroxybenzoate		111	0	100		0		137	8	4139.91	2687.75	2024.34	3363.29	2021.56	2847.37	2145.59	4162.3	4928.93	1348.75	7567.57	4030.63	8516.58	14761	34368.1	11386	7575.03	15321.3	7927.46	19685.9	19356.4	23542.9	10963	16295.1	568000	425000	469000	552000	503500
13	4-Pyridoxic acid		112	0	100		0		182.1	2.52	1364.68	4927.54	962.389	4557.12	1630.73	2688.49	10498.1	6492.15	3208.12	7046.26	5289.58	6506.84	4450.26	2619.5	5920.18	3695.98	1944.78	3726.14	6165.8	5141.36	4638.61	5045.71	5807.41	5359.78	250000	204000	265000	214000	233250
14	5-Hydroxyindole-3-acetate		113	0	100		0		190.1	6.79	170.872	386.034	23.5619	465.982	187.332	246.756	81.6092	111.518	81.2183	113.879	103.089	98.2627	2094.24	3690.25	4501.11	2652.76	2605.04	3108.68	2487.05	2712.04	2905.94	1737.14	2925.93	2553.62	85400	90600	99800	91200	91750
15	5-Hydroxytryptophan		114	0	100		0		221.1	17.9	131.881	108.959	44.2478	143.774	157.682	117.309	521.073	223.56	1274.11	85.4093	2648.65	950.561	74.5201	673.04	241.685	1232.49	22.449	448.837	138.342	195.812	579.208	305.143	651.852	374.071	9400	9010	6940	8900	8562.5
16	5-Methyltetrahydrofolic acid		115	0	100		0		458.2	11.9	48.9679	105.402	11.8363	102.696	71.9677	68.1739	265.9	223.56	27.0558	95.0178	123.552	147.017	83.7696	102.103	94.6785	95.38	147.659	104.718	248.705	83.7696	105.941	30.4571	79.2593	109.626	10540	10700	12300	11500	11260
17	Acetoacetate		116	0	100		0		101	6.19	584.862	952.569	141.593	1082.16	2142.86	980.808	142.912	195.812	162.437	275.445	123.552	180.031	7975.57	4168.26	6252.77	14456	11776.7	8925.87	4699.48	251.309	2455.45	1462.86	1859.26	2145.67	133000	127000	130000	169000	139750
18	Acetylcholine		117	0	100		0		146.1	12	620413	715415	620575	666239	617251	647979	934866	1.03665e+06	1.31472e+06	893238	737452	983385	485166	304015	696231	396423	316927	439752	1.69948e+06	685864	2.34653e+06	788571	977778	1.29965e+06	43500000	49400000	48900000	44000000	46450000
19	Acetyl-CoA		118	0	100		0		403.6	11.9	134.174	189.723	100.332	287.548	100.674	162.49	347.51	251.309	352.284	322.776	185.328	291.841	102.443	265.774	365.854	150.522	96.0384	196.126	497.927	586.387	211.386	1097.14	237.037	525.976	21600	29500	28300	27700	26775
20	Aconitate		119	0	100		0		173	6.45	1238.53	1646.9	1294.25	1412.07	1215.63	1361.48	2352.49	1240.84	1923.86	1348.75	1494.21	1672.03	2792.32	2715.11	3348.12	2146.05	2076.83	2615.68	4476.68	5287.96	4069.31	5942.86	5533.33	5062.03	131000	122000	125000	115000	123250
21	Adenine		120	0	100		0		134.1	4.98	1158.26	2332.02	1183.63	1566.11	884.097	1424.82	2176.25	6335.08	4441.62	4839.86	3274.13	4213.39	1954.62	1162.52	957.871	1216.1	1031.21	1264.47	2875.65	3769.63	4094.06	4662.86	3718.52	3824.14	189000	185000	171000	169000	178500
22	Adenosine		121	0	100		0		266.1	5.25	4690.37	7760.21	3373.89	6842.11	5835.58	5700.43	409.962	307.33	189.848	265.836	413.127	317.221	4083.77	3518.16	1443.46	3278.69	13925.6	5249.93	414.508	391.099	290.594	518.286	474.074	417.712	400000	296000	378000	376000	362500
23	Adenosine		122	0	100		0		268.1	5.28	290138	337286	290929	315789	384097	323648	70114.9	87434.6	52791.9	67259.8	48262.5	65172.7	469459	407266	257206	393443	340936	373662	93782.4	67015.7	71782.2	61714.3	52296.3	69318.2	29000000	27600000	27800000	29200000	28400000
24	Adenylosuccinate		123	0	100		0		462.1	3.75	220.183	2028.99	217.92	13.7356	1347.71	765.707	24252.9	85340.3	32182.7	21779.4	33976.8	39506.4	176.265	745.698	982.262	898.659	178.872	596.351	10621.8	10994.8	6138.61	10228.6	9111.11	9418.96	493000	514000	504000	492000	500750
25	ADMA		124	0	100		0		203.1	14	26032.1	55204.2	27986.7	69319.6	21967.7	40102.1	39080.5	83.7696	54.3147	303.915	82.6255	7921.02	37.3473	51.0516	47.2284	87.4814	51.2605	54.8738	138.342	97.9058	237.624	182.857	237.037	178.753	2690000	2260000	3050000	3080000	2770000
26	ADP		125	0	100		0		426	12.3	2.94801	1818.18	1460.18	2811.3	1280.32	1474.59	6321.84	8219.9	8375.63	4590.75	5791.51	6659.92	2931.94	4282.98	5698.45	3681.07	4021.61	4123.21	13057	13350.8	8514.85	15028.6	11629.6	12316.2	45000	45500	44300	49000	45950
27	Alanine		126	0	100		0		90	10.6	244266	470356	257743	436457	382749	358314	455939	602094	424873	437722	478764	479879	884817	915870	937916	919523	740696	879764	1.15544e+06	811518	1.16832e+06	914286	1000000	1.00991e+06	38000000	33200000	33600000	31100000	33975000
28	Allantoin		127	0	100		0		159	5.69	844.037	1159.42	431.416	1296.53	683.288	882.939	1206.9	1115.18	1137.06	967.972	907.336	1066.89	1228.62	877.629	2771.62	1579.73	1932.77	1678.07	2269.43	2596.86	1267.33	2685.71	2607.41	2285.35	104000	91300	92300	111000	99650
29	AMP		128	0	100		0		346.1	12	96100.9	168643	46792	125160	68059.3	100951	173180	186387	196447	144840	154054	170982	91797.6	151243	221729	85245.9	158463	141696	332642	315707	273267	372571	302963	319430	10800000	9990000	11800000	11800000	11097500
30	Anthranilate		129	0	100		0		138	5.18	4071.1	5362.32	5409.29	6919.13	4043.13	5160.99	10804.6	13926.7	9847.72	11814.9	11698.8	11618.6	10314.1	9082.22	11130.8	10208.6	6686.67	9484.5	17202.1	15654.5	9752.48	10057.1	13703.7	13274	553000	502000	577000	539000	542750
31	Arginine		130	0	100		0		175.1	14.3	176606	393939	125000	323492	176550	239117	377778	3869.11	918.782	494.662	575.29	76727.1	270.506	801.147	147.894	250.373	159.664	325.917	886.01	1759.16	2034.65	1034.29	1622.22	1467.27	19100000	16100000	17300000	18800000	17825000
32	Argininosuccinate		131	0	100		0		291.1	12.4	311.927	513.834	217.92	595.635	439.353	415.734	265.9	502.618	512.69	494.662	617.761	478.726	1493.89	449.331	1290.47	1137.11	1452.58	1164.68	4398.96	6020.94	3485.15	7600	7311.11	5763.23	39000	41300	37200	40000	39375
33	Ascorbate		132	0	100		0		175	9	35435.8	140.975	6946.9	93581.5	14150.9	30051.2	265.9	195.812	2736.04	494.662	257.529	789.989	93.1937	40.9178	118.404	31.8927	11848.7	2426.63	387.047	83.7696	132.178	213.143	118.519	186.931	2290000	2940000	2600000	2390000	2555000
34	Asparagine		133	0	100		0		133.1	11.8	13876.1	22397.9	7555.31	25417.2	11226.4	16094.6	16934.9	26073.3	13857.9	14128.1	23050.2	18808.9	50959.9	58317.4	31263.9	46944.9	37455	44988.2	16943	23141.4	1504.95	16514.3	22148.1	16050.4	2490000	2190000	2540000	2340000	2390000
35	Aspartate		134	0	100		0		134	11.9	39105.5	62582.3	22455.8	67265.7	35040.4	45290	145211	174869	120812	115658	173745	146059	22338.6	38623.3	20665.2	18777.9	9783.91	22037.8	210363	50575.9	94554.5	53371.4	53111.1	92395.1	4630000	3840000	4220000	4360000	4262500
36	ATP		135	0	100		0		506	13	24.4266	14.0975	23.6726	13.7356	7.18329	16.6231	20.4215	112.042	108.122	38.0783	103.089	76.3505	9.30192	10.1912	11.8182	15.9463	19.2077	13.2931	110.363	56.0209	132.178	91.4286	118.519	101.702	1040	1070	1070	1100	1070
37	Betaine		136	0	100		0		118.1	8.33	784404	504611	547566	501926	746631	617028	3.44444e+06	4.39267e+06	4.09137e+06	3.00712e+06	3.46718e+06	3.68056e+06	970332	1.82983e+06	1.26164e+06	900149	695078	1.13141e+06	4.73057e+06	4.7644e+06	3.83663e+06	5.06857e+06	5.42222e+06	4.76448e+06	81900000	74000000	81400000	88100000	81350000
38	Bilirubin		137	0	100		0		583.3	2.15	1536.7	2028.99	1038.72	794.608	1711.59	1422.12	551.724	2178.01	624.365	1387.9	969.112	1142.22	1666.67	1214.15	1407.98	1803.28	717.887	1361.99	829.016	1005.24	1004.95	1188.57	1185.19	1042.59	110000	123100	136000	118000	121775
39	Biotin		138	0	100		0		243.1	5.16	5378.44	8458.5	6006.64	13222.1	5822.1	7777.55	11992.3	23560.2	8172.59	19679.7	14324.3	15545.8	25305.4	16022.9	14301.6	26080.5	22449	20831.9	13886	13193.7	9950.5	3994.29	11703.7	10545.6	1480000	1230000	1200000	1170000	1270000
40	cAMP		139	0	100		0		328.1	7.91	605.505	998.682	377.212	1225.93	633.423	768.151	754.789	1450.26	593.909	18.968	945.946	752.775	577.661	969.407	982.262	500.745	806.723	767.36	1243.52	753.927	1084.16	2.94801	748.148	766.541	58700	61900	63000	76800	65100
41	Carnitine		140	0	100		0		163.1	11.3	125000	177866	120575	200257	164420	157624	386973	396335	394416	313523	424710	383192	221640	183748	277162	192250	154862	205932	287047	318848	224752	309714	284444	284961	12100000	12300000	12600000	13300000	12575000
42	Carnosine		141	0	100		0		227.1	12.4	1071.1	3030.3	2621.68	1283.7	1698.11	1940.98	1084.29	1172.77	1233.5	1081.85	760.618	1066.61	16841.2	7380.5	23059.9	12921	10432.2	14126.9	21139.9	27696.3	4950.5	27257.1	17037	19616.2	579000	491000	413000	447000	482500
43	CDP		142	0	100		0		402	19.2	6.11239	2.94801	2.94801	6.84211	2.94801	4.3597	2.94801	2.94801	2.94801	2.94801	2.94801	2.94801	2.94801	2.94801	2.94801	15.9463	2.94801	5.54768	2.94801	2.94801	26.3861	61.1429	39.4815	26.5813	2.94801	2.94801	2.94801	2.94801	2.94801
44	cGMP		143	0	100		0		344	7.88	6.11239	28.0632	11.8363	13.7356	14.4205	14.8336	40.9962	56.0209	27.0558	2.94801	20.5792	29.52	18.6736	20.4589	82.9268	2.94801	6.39856	26.2812	2.94801	27.9058	26.3861	2.94801	2.94801	12.6272	1670	1600	1533	1270	1518.25
45	Chenodeoxycholate		144	0	100		0		391.3	3.41	128.44	646.904	29.5354	82.1566	21.5633	181.72	102.299	111.518	27.0558	190.036	82.2394	102.63	55.8464	112.237	94.6785	87.4814	64.1056	82.8698	2.94801	56.0209	185.149	2.94801	79.2593	65.2649	5300	5870	4800	5540	5377.5
46	Cholate		145	0	100		0		407.3	4.92	3853.21	35309.6	2953.54	3299.1	2601.08	9603.31	347.51	1282.72	406.091	2128.11	513.514	935.59	10733	9024.86	60088.7	14754.1	8463.39	20612.8	5145.08	3827.23	712.871	8000	7037.04	4944.44	780000	600000	603000	663000	661500
47	Citrate		146	0	100		0		191	13	6490.83	2.94801	6526.55	4030.81	5700.81	4550.39	2.94801	25026.2	20913.7	17188.6	11428.6	14912	153.752	40.7266	5144.12	5499.25	86.4346	2184.86	8756.48	111.518	10594.1	305.143	474.074	4048.25	554000	503000	504000	584000	536250
48	Citrulline		147	0	100		0		174.1	12	14564.2	19631.1	11393.8	16303	9231.81	14224.8	11685.8	12984.3	6954.31	8078.29	6911.2	9322.78	28795.8	45315.5	36807.1	36363.6	38655.5	37187.5	11761.7	6858.64	7029.7	5394.29	5140.74	7237.01	1770000	1860000	2080000	1990000	1925000
49	CMP		148	0	100		0		322.1	12.3	4495.41	8313.57	4015.49	14249	6374.66	7489.63	20306.5	18638.7	16345.2	14875.4	16486.5	17330.5	15078.5	16099.4	23725.1	16244.4	18487.4	17927	26891.2	17172.8	15000	17257.1	15185.2	18301.3	399000	439000	484000	466000	447000
50	Cobalamin		149	0	100		0		678.3	2.24	520.642	421.607	1592.92	116.431	597.035	649.727	204.598	670.157	837.563	683.274	1235.52	726.223	315.881	785.851	687.361	1320.42	717.887	765.48	442.487	670.157	925.743	1251.43	1696.3	997.222	36800	41900	34700	38600	38000
51	Cotinine		150	0	100		0		177.1	17.9	3807.34	2239.79	1294.25	2605.91	2452.83	2480.02	6245.21	7120.42	16700.5	8434.16	11467.2	9993.5	3036.65	2791.59	6851.44	3353.2	2448.98	3696.37	9740.93	14450.3	6336.63	12857.1	24370.4	13551.1	157000	139000	150000	178000	156000
52	Creatine		151	0	100		0		132.1	10.7	608945	698287	620575	706033	809973	688763	2.03831e+06	2.57592e+06	2.69036e+06	1.88612e+06	2.15444e+06	2.26903e+06	996510	994264	1.20399e+06	825633	709484	945976	2.36269e+06	2.39267e+06	1.77228e+06	2.51429e+06	2.93333e+06	2.39505e+06	57200000	55600000	55000000	55000000	55700000
53	Creatinine		152	0	100		0		114.1	5.35	197248	239789	181416	297818	283019	239858	398467	348691	680203	608541	463320	499845	326353	204589	374723	323398	291717	304156	438342	351309	167822	286286	285185	305789	21100000	16300000	18900000	20200000	19125000
54	CTP		153	0	100		0		482	18	6.11239	2.94801	2.94801	6.84211	7.18329	5.20676	20.4215	2.94801	27.0558	2.94801	20.5792	14.7905	2.94801	10.1912	11.8182	7.94337	12.8451	9.14918	55.4404	2.94801	52.9703	30.4571	39.4815	36.2595	1130	1070	1070	1230	1125
55	Cystamine		154	0	100		0		153	3.81	122.706	183.136	111.726	68.5494	86.2534	114.474	265.9	251.309	216.751	76.1566	113.514	184.726	65.2705	142.83	141.907	87.4814	121.248	111.747	248.705	195.812	132.178	122.286	197.778	179.352	10100	9270	9730	9070	9542.5
56	Cystathionine		155	0	100		0		221.1	12.6	42.8899	7.0224	41.2611	27.3427	21.5633	28.0159	142.912	223.56	189.848	190.036	123.552	173.982	65.2705	152.964	106.43	95.38	19.2077	87.8504	554.404	528.796	925.743	702.857	237.037	589.767	16000	12800	15500	15200	14875
57	Cysteamine		156	0	100		0		78	4.39	2626.15	2951.25	1902.65	3658.54	2371.97	2702.11	3517.24	6387.43	5329.95	3245.55	3544.4	4404.92	4729.49	3499.04	5942.35	4217.59	4225.69	4522.83	1186.53	4413.61	2772.28	6400	4977.78	3950.04	222000	240000	221000	268000	237750
58	Cysteine		157	0	100		0		122	11	287.844	555.995	265.487	328.626	115.094	310.609	286.207	363.351	162.437	341.993	267.568	284.311	726.003	847.036	674.058	636.364	499.4	676.572	663.212	727.749	925.743	182.857	553.333	610.579	43100	40000	45000	37900	41500
59	Cytidine		158	0	100		0		244.1	6.99	15481.7	19762.8	9623.89	19127.1	10363.9	14871.9	36436.8	34450.3	32436.5	42704.6	54826.3	40170.9	28621.3	26386.2	14168.5	37853.9	52941.2	31994.2	61139.9	30261.8	20049.5	26400	27481.5	33066.5	1800000	1400000	1700000	1980000	1720000
60	Cytosine		159	0	100		0		112	12.6	2018.35	9446.64	6725.66	6251.6	4797.84	5848.02	6053.64	42931.9	10203	16619.2	185.328	15198.6	27.9232	61.1855	153.88	87.4814	44.898	75.0737	387.047	474.869	132.178	91.4286	277.037	272.512	979000	922000	1240000	1320000	1115250
61	DCDP		160	0	100		0		386	12	2155.96	5744.4	2444.69	13992.3	8140.16	6495.5	8122.61	15183.2	10000	10284.7	12007.7	11119.7	5479.93	6195.03	3259.42	4769	5930.37	5126.75	6165.8	6910.99	2589.11	4240	3755.56	4732.29	374000	346000	320000	327000	341750
62	DCMP		161	0	100		0		306.1	12.4	55.0459	225.296	59.0708	424.904	115.094	175.882	1249.04	1790.58	1243.65	1975.09	2328.19	1717.31	652.705	684.512	1787.14	429.21	883.553	887.424	1823.83	1507.85	1242.57	942.857	1696.3	1442.68	7600	7470	6700	6400	7042.5
63	DCTP		162	0	100		0		466	0.171	2.94801	2.94801	2.94801	2.94801	2.94801	2.94801	2.94801	2.94801	2.94801	18.968	2.94801	6.152	2.94801	10.1912	2.94801	7.94337	6.39856	6.08583	2.94801	56.0209	2.94801	61.1429	2.94801	25.2016	2.94801	2.94801	2.94801	2.94801	2.94801
64	D-Erythrose 4-phosphate		163	0	100		0		199	12.1	238.532	577.075	560.841	630.295	582.21	517.791	2659	2219.9	3197.97	4021.35	4362.93	3292.23	1535.78	1449.33	2093.13	1391.95	1006	1495.24	4507.77	4188.48	3064.36	1891.43	5888.89	3908.19	29700	24500	25600	37400	29300
65	D-Fructose 1,6-bisphosphate		164	0	100		0		339	12.2	150.229	1227.93	64.9336	944.801	1401.62	757.903	2739.46	3947.64	2619.29	4946.62	5598.46	3970.29	3403.14	1489.48	3126.39	3025.34	2136.85	2636.24	10777.2	6753.93	9158.42	6800	4622.22	7622.35	75000	79500	64000	74000	73125
66	D-Fructose 2,6-bisphosphate		165	0	100		0		339	12.6	73.3945	98.419	35.3982	75.353	71.9677	70.9065	265.9	474.869	512.69	151.957	164.865	314.056	46.5969	112.237	485.588	87.4814	76.8307	161.747	1575.13	1450.26	343.564	1188.57	1622.22	1235.95	38400	31700	35500	36700	35575
67	D-Glucuronic acid		166	0	100		0		193	11.6	2052.75	4189.72	1969.03	4967.91	2021.56	3040.19	1061.3	1481.68	1274.11	814.947	698.842	1066.18	5916.23	4091.78	3414.63	8196.72	6326.53	5589.18	1466.32	1534.03	185.149	91.4286	1459.26	947.238	207000	233000	273000	221000	233500
68	D-Glycerate 2-phosphate		167	0	100		0		185	11.5	4506.88	6350.46	2754.42	6315.79	1725.07	4330.52	61.3027	643.979	162.437	132.74	185.328	237.157	4659.69	2619.5	2372.51	5275.71	7875.15	4560.51	165.803	83.7696	52.9703	121.714	276.296	140.111	356000	285000	272000	248000	290250
69	DHAP		168	0	100		0		169	12	113.188	927.536	59.0708	458.28	86.2534	328.866	1390.8	696.335	1898.48	814.947	803.089	1120.73	204.188	305.927	638.581	684.054	1836.73	733.897	2170.98	670.157	1663.37	3200	2133.33	1967.57	39200	37900	39800	51200	42025
70	Dihydrofolate		169	0	100		0		442.2	18.4	12.2706	7.0224	5.89602	13.7356	2.94801	8.37453	2.94801	2.94801	2.94801	2.94801	41.3127	10.621	9.30192	2.94801	23.7251	7.94337	2.94801	9.37327	2.94801	56.0209	26.3861	30.4571	2.94801	23.752	2.94801	2.94801	2.94801	2.94801	2.94801
71	Dimethyl glycine		170	0	100		0		104.1	8.16	276376	112.516	141.593	51.3479	71.9677	55350.7	471.264	307.33	297.97	359.431	309.266	349.052	149.04	127.916	496.674	63.6364	51.2605	177.705	276.166	586.387	2.94801	657.143	948.148	494.158	40400	39100	34500	36500	37625
72	Dopamine		171	0	100		0		154.1	5.18	78669.7	106719	75553.1	125160	66037.7	90428.1	198084	265969	200508	212100	228571	221046	193717	151434	177384	183308	133253	167819	275130	259162	186139	185714	260000	233229	10400000	9390000	10100000	10800000	10172500
73	D-Ribulose 5-phosphate		172	0	100		0		229	12.1	1892.2	4953.89	1100.66	4801.03	1886.79	2926.91	10459.8	15235.6	10710.7	8256.23	7915.06	10515.5	3630.02	5793.5	8957.87	4247.39	6254.5	5776.66	15544	10890.1	6930.69	11828.6	14518.5	11942.4	379000	362000	310000	446000	374250
74	DTMP		173	0	100		0		321.1	6.63	220.183	49.1436	189.159	671.374	50.2695	236.026	286.207	363.351	297.97	683.274	722.008	470.562	167.714	1009.56	1277.16	827.124	691.477	794.607	1051.81	1842.93	3064.36	2011.43	2133.33	2020.77	35700	35200	35800	29300	34000
75	DTTP		174	0	100		0		481	12.1	91.7431	84.3215	35.3982	95.8922	93.531	80.1772	347.51	279.581	108.122	75.8007	20.5792	166.318	27.9232	61.1855	94.6785	79.5827	83.3133	69.3366	276.166	83.7696	343.069	182.857	237.037	224.58	47600	44300	34700	45540	43035
76	DUMP		175	0	100		0		307	12.2	4816.51	5612.65	2112.83	4801.03	1994.61	3867.53	8544.06	13926.7	9644.67	6619.22	8416.99	9430.33	3769.63	730.402	3392.46	2563.34	294.118	2149.99	12797.9	837.696	7821.78	9428.57	2925.93	6762.38	730000	790000	879000	683000	770500
77	DUTP		176	0	100		0		467	12.6	6.11239	14.0975	5.89602	13.7356	7.18329	9.40495	61.3027	111.518	54.3147	18.968	41.3127	57.4833	37.1728	20.4589	23.7251	23.845	12.8451	23.6094	27.6166	27.9058	26.3861	30.4571	39.4815	30.3694	1200	1030	1070	1130	1107.5
78	Epinephrine		177	0	100		0		184.1	12.5	2064.22	3702.24	2300.88	3761.23	3194.07	3004.53	2432.95	2670.16	2736.04	1633.45	2749.03	2444.33	2233.86	2868.07	2099.78	2354.69	3061.22	2523.52	2528.5	2764.4	2009.9	1617.14	2548.15	2293.62	284000	224000	217000	264000	247250
79	Folate		178	0	100		0		440.1	2.73	2.94801	21.0804	2.94801	2.94801	2.94801	6.57448	2.94801	2.94801	2.94801	2.94801	20.5792	6.47424	9.30192	10.1912	2.94801	39.7914	12.8451	15.0155	2.94801	2.94801	2.94801	30.4571	2.94801	8.44984	2.94801	2.94801	2.94801	2.94801	2.94801
80	Folinate		179	0	100		0		472.2	1.93	18.3486	7.0224	11.8363	2.94801	7.18329	9.46772	40.9962	2.94801	2.94801	18.968	2.94801	13.7616	18.6736	2.94801	2.94801	15.9463	12.8451	10.6722	55.4404	56.0209	52.9703	61.1429	118.519	68.8186	1130	1200	1070	1120	1130
81	Fructose		180	0	100		0		179	6.45	152523	256917	122788	385109	111860	205839	66666.7	31518.3	53299.5	49466.2	32200.8	46630.3	664921	552581	878049	652757	749100	699482	709845	738220	431683	651429	422963	590828	29700000	27700000	28500000	30400000	29075000
82	Fructose 1-phosphate		181	0	100		0		259	12.3	3864.68	16864.3	3794.25	16046.2	10795.1	10272.9	78160.9	123560	96954.3	131673	171429	120355	54101.2	27915.9	87361.4	45454.5	75390.2	58044.6	99481.9	90052.4	105446	61714.3	104444	92227.7	1350000	1110000	1340000	1520000	1330000
83	Fumarate		182	0	100		0		115	11.8	1639.91	4729.91	2101.77	5288.83	1522.91	3056.67	6130.27	18952.9	1827.41	7153.02	1722.01	7157.12	5654.45	10631	11042.1	8479.88	7286.91	8618.87	74093.3	53403.1	31287.1	67428.6	40370.4	53316.5	1860000	1350000	1520000	1829000	1639750
84	GDP		183	0	100		0		442	12	1250	2055.34	584.071	1630.3	640.162	1231.97	1310.34	1282.72	1649.75	740.214	988.417	1194.29	764.398	1367.11	1751.66	512.668	819.928	1043.15	1766.84	1984.29	1584.16	2622.86	1896.3	1970.89	169000	183000	219000	177000	187000
85	Geranyl pyrophosphate		184	0	100		0		313.1	12.1	642.202	695.652	271.018	924.262	222.372	551.101	2616.86	2654.45	1436.55	1405.69	1729.73	1968.66	59336.8	59847	137029	39642.3	17887.2	62748.4	93782.4	15497.4	19356.4	16628.6	19333.3	32919.6	2010000	1730000	2150000	1950000	1960000
86	Glucose 1-phosphate		185	0	100		0		259	12.3	2580.28	11093.5	3407.08	12336.3	9380.05	7759.46	63984.7	104712	74619.3	118505	130888	98541.9	36474.7	15200.8	62749.4	29806.3	39735.9	36793.4	83937.8	81151.8	87623.8	58857.1	83703.7	79054.9	1150000	927000	1150000	1120000	1086750
87	Glutamate		186	0	100		0		148.1	11.8	181193	242424	172566	188703	181941	193365	551724	701571	736041	516014	621622	625394	296684	326960	332594	260805	184874	280383	875648	701571	787129	805714	837037	801420	17600000	18400000	16700000	18700000	17850000
88	Glutamine		187	0	100		0		147.1	11.8	76146.8	144928	50331.9	151476	95956.9	103768	324138	441361	352284	387900	362548	373646	312391	330784	399113	281669	211285	307048	979275	848168	712871	805714	933333	855872	21300000	22400000	21600000	20900000	21550000
89	Glutathione		188	0	100		0		306.1	11.8	15367	34387.4	7831.86	36970.5	18598.4	22631	98084.3	123560	85279.2	84341.6	91119.7	96477	41361.3	38814.5	35255	27570.8	83793.5	45359	215544	126702	111386	122857	158519	147001	5040000	4980000	5350000	4820000	5047500
90	Glyceraldehyde		189	0	100		0		89	8.04	201.835	210.804	136.062	363.286	165.768	215.551	204.598	167.539	189.848	246.975	371.042	236	884.817	284.895	1560.98	938.897	963.986	926.714	110.363	1874.35	529.703	2411.43	553.333	1095.83	34000	33100	36800	26200	32525
91	Glycerol		190	0	100		0		93	14.7	67.3165	147.563	47.2345	184.852	28.841	95.1614	143.295	307.33	243.655	190.036	185.328	213.929	83.7696	61.1855	59.2018	47.69	44.7779	59.325	442.487	195.812	79.2079	305.143	395.556	283.641	17470	14270	19200	14900	16460
92	Glycerol-3-phosphate		191	0	100		0		171	12	36697.2	76152.8	32522.1	121823	41509.4	61740.9	109962	86911	104569	73665.5	121622	99345.7	17975.6	27915.9	70510	15797.3	8871.55	28214.1	187565	76963.4	92079.2	97714.3	74074.1	105679	4460000	4220000	4640000	4850000	4542500
93	Glycine		192	0	100		0		76	11.4	18233.9	31488.8	16482.3	34788.2	23450.1	24888.7	27662.8	34240.8	27055.8	25231.3	32355.2	29309.2	60907.5	52390.1	75166.3	60059.6	51380.6	59980.8	96891.2	90575.9	75247.5	74285.7	68000	81000.1	3030000	2720000	2960000	3020000	2932500
94	Glycochenodeoxycholate		193	0	100		0		448.3	11.3	6.11239	21.0804	29.5354	13.7356	28.7062	19.834	40.9962	2.94801	54.3147	18.968	20.5792	27.5612	37.3473	71.3193	11.8182	71.535	38.4154	46.087	55.4404	27.9058	2.94801	61.1429	39.4815	37.3837	1670	1800	1600	1600	1667.5
95	Glycocholate		194	0	100		0		464.3	5.84	392.202	1026.35	566.372	349.166	338.275	534.473	163.602	83.7696	54.3147	75.8007	2.94801	76.0869	977.312	4091.78	294.9	1803.28	1656.66	1764.79	2.94801	56.0209	52.9703	91.4286	118.519	64.3773	49100	57700	46400	62400	53900
96	GMP		195	0	100		0		362.1	12.3	3153.67	10513.8	3373.89	12965.3	9407.01	7882.75	42145.6	50209.4	52284.3	39501.8	44015.4	45631.3	10174.5	16883.4	36141.9	13308.5	20408.2	19383.3	73575.1	63350.8	46534.7	62857.1	51777.8	59619.1	533000	479000	607000	533000	538000
97	GTP		196	0	100		0		522	2.33	2.94801	7.0224	2.94801	2.94801	14.4205	6.05738	20.4215	2.94801	81.2183	2.94801	2.94801	22.0968	2.94801	20.4589	2.94801	2.94801	2.94801	6.45019	2.94801	2.94801	2.94801	2.94801	39.4815	10.2547	2.94801	2.94801	2.94801	2.94801	2.94801
98	Guanine		197	0	100		0		152	7.51	2809.63	6113.31	2743.36	5545.57	3894.88	4221.35	4329.5	5497.38	3736.04	6868.33	4671.81	5020.61	6474.69	6195.03	4966.74	8211.62	15366.1	8242.85	3678.76	4523.56	2905.94	2285.71	4074.07	3493.61	463000	343000	427000	446000	419750
99	Guanosine		198	0	100		0		284	7.5	28899.1	49670.6	22345.1	53915.3	33692.7	37704.6	27854.4	45078.5	32487.3	57651.2	37104.2	40035.1	58115.2	58317.4	38137.5	64381.5	123649	68520.2	28652.8	34136.1	24108.9	20742.9	32296.3	27987.4	3730000	2760000	3460000	3890000	3460000
100	Hippurate		199	0	100		0		178.1	4.51	1192.66	945.982	1089.6	634.146	308.625	834.203	1452.11	1732.98	791.878	494.662	513.514	997.029	279.232	61.1855	603.104	143.07	339.736	285.266	165.803	391.099	211.386	121.714	514.074	280.815	60000	47500	55000	54400	54225
101	Histidine		200	0	100		0		156.1	11.9	66513.8	110145	39048.7	97561	39487.9	70551.2	76628.4	105759	97461.9	66903.9	105019	90354.5	179756	307839	252772	295082	231693	253428	311917	200000	158911	258857	348148	255567	5090000	7130000	6200000	6600000	6255000
102	Homocysteine		201	0	100		0		136	6.25	5768.35	10658.8	5464.6	11681.6	5471.7	7809.01	1923.37	2376.96	1324.87	3056.94	2760.62	2288.55	5130.89	5277.25	5898	7481.37	4201.68	5597.84	4533.68	4052.36	4702.97	3931.43	3162.96	4076.68	338000	340000	340000	395000	353250
103	Homocystine		202	0	100		0		267.1	1.05	2.94801	2.94801	2.94801	2.94801	7.18329	3.79506	2.94801	2.94801	27.0558	2.94801	2.94801	7.76957	2.94801	10.1912	2.94801	2.94801	2.94801	4.39665	2.94801	2.94801	2.94801	2.94801	2.94801	2.94801	2.94801	2.94801	2.94801	2.94801	2.94801
104	Homogentisate		203	0	100		0		167	0.224	85.6651	126.482	111.726	75.353	82.7493	96.3951	316.858	251.309	189.848	142.349	309.266	241.926	121.117	61.1855	212.86	31.7437	195.678	124.517	248.705	279.581	145.545	518.286	316.296	301.682	11900	9600	9600	10900	10500
105	Homoserine		204	0	100		0		120.2	9.31	27.5229	28.195	64.9336	116.431	21.5633	51.7292	183.908	56.0209	189.848	95.0178	185.714	142.102	74.5201	91.7782	141.907	223.547	15.9664	109.544	332.124	612.565	132.178	198.286	118.519	278.734	3980000	4030000	4770000	5460000	4560000
106	Homoserine		205	0	100		0		120.1	11	54013.8	120158	52323	108216	77358.5	82413.8	126437	191099	98984.8	111744	136293	132912	249564	281071	254989	204173	135654	225090	300518	310471	339109	283429	250370	296779	11500000	9330000	10400000	11200000	10607500
107	Homovanillate		206	0	100		0		181.1	12.1	2029.82	2094.86	1935.84	2721.44	3045.82	2365.56	2.94801	10104.7	11675.1	2.94801	5830.12	5523.17	2.94801	3097.51	3614.19	2548.44	1296.52	2111.92	10725.4	10157.1	10594.1	12914.3	12074.1	11293	169000	183000	171000	174540	174385
108	Hydroxykynurenine		207	0	100		0		223.1	17.6	18.3486	14.0975	11.8363	20.5392	28.7062	18.7056	20.4215	56.0209	81.2183	95.0178	41.3127	58.7982	27.9232	30.5927	59.2018	23.845	12.8451	30.8816	55.4404	97.9058	79.2079	91.4286	79.2593	80.6484	1300	1600	1530	1530	1490
109	Hydroxyproline		208	0	100		0		132.1	7.68	352064	367589	294248	356868	400270	354208	421456	790576	482234	537367	621622	570651	478185	497132	647450	442623	360144	485107	943005	832461	618812	685714	691852	754369	29500000	30300000	28900000	28700000	29350000
110	Hypoxanthine		209	0	100		0		135	5.17	285550	346509	265487	427471	241240	313251	720307	884817	685279	743772	818533	770542	623037	544933	623060	560358	438175	557913	989637	879581	702970	697143	925926	839052	36600000	32500000	33800000	35800000	34675000
111	IMP		210	0	100		0		347	12	15825.7	18972.3	6305.31	25545.6	12843.7	15898.5	179310	119372	130964	54804.3	154440	127778	11291.4	33269.6	27716.2	10775	29411.8	22492.8	162176	125654	68811.9	60571.4	62000	95842.8	1430000	1420000	1510000	1440000	1450000
112	Inosine		211	0	100		0		267.1	6.31	524083	696970	463496	784339	597035	613184	1.00766e+06	2.15183e+06	1.20812e+06	1.47331e+06	1.16988e+06	1.40216e+06	774869	856597	643016	761550	683073	743821	1.03627e+06	1.26702e+06	1000000	897143	1.37037e+06	1.11416e+06	54900000	50200000	51200000	51800000	52025000
113	Inositol		212	0	100		0		179.1	3.27	85.6651	91.4361	94.469	232.349	100.674	120.919	347.51	307.33	379.188	113.879	226.641	274.909	186.736	122.371	70.9534	71.535	51.2605	100.571	193.782	195.812	79.2079	122.286	514.074	221.032	13070	14900	14400	14900	14317.5
114	Kynurenate		213	0	100		0		188	11.4	1433.49	2490.12	2400.44	1912.71	2587.6	2164.87	785.441	753.927	2086.29	95.0178	41.3127	752.398	65.096	66.348	70.9534	23.845	25.5702	50.3625	96.8912	223.56	105.446	182.857	118.519	145.455	146000	144000	151000	148000	147250
115	Kynurenine		214	0	100		0		209	7.04	2373.85	3399.21	1570.8	3068.04	1428.57	2368.09	1739.46	2429.32	1979.7	2647.69	1752.9	2109.81	2164.05	1856.6	1940.13	1579.73	1096.04	1727.31	2487.05	2209.42	2960.4	2777.14	1718.52	2430.51	130000	125000	136000	176000	141750
116	Lactose		215	0	100		0		341.1	9.33	48.9679	119.499	11.8363	82.1566	64.69	65.43	102.299	111.518	81.2183	76.1566	41.3127	82.501	130.366	10.1912	106.43	103.428	96.0384	89.2908	27.6166	56.0209	79.2079	2.94801	39.4815	41.055	6100	4800	6400	5330	5657.5
117	L-NMMA		216	0	100		0		189.1	14.1	3669.72	8537.55	5066.37	9897.3	2708.89	5975.97	6398.47	9895.29	5279.19	170.819	82.2394	4365.2	18.6736	71.3193	94.6785	15.9463	2.94801	40.7132	82.9016	139.791	211.386	91.4286	118.519	128.805	435000	380000	516000	506000	459250
118	Malate		217	0	100		0		133	11.8	50114.7	122266	23451.3	89602.1	55525.6	68192	104215	309948	48274.1	149822	433591	209170	193717	193117	279379	210134	182473	211764	1.87565e+06	1.42932e+06	747525	1.70857e+06	1.11852e+06	1.37592e+06	26400000	24200000	26500000	21600000	24675000
119	Malonate		218	0	100		0		103	6.6	15596.3	8418.97	9568.58	36970.5	5970.35	15304.9	15708.8	31361.3	30304.6	73665.5	28880.3	35984.1	25829	89101.3	150111	100000	115966	96201.5	61658	150262	153960	157143	135556	131716	3590000	3220000	3460000	3930000	3550000
120	Malonyl-CoA		219	0	100		0		425.6	4.23	24.4266	189.723	29.5354	2.94801	71.9677	63.7202	102.299	528.796	325.381	133.096	206.178	259.15	9.30192	10.1912	118.404	15.9463	6.39856	32.0483	55.4404	27.9058	79.2079	91.4286	197.778	90.3521	5700	4800	5870	6940	5827.5
121	Melatonin		220	0	100		0		233.1	7.12	2878.44	2977.6	1880.53	3440.31	1415.09	2518.4	45593.9	50785.3	25329.9	53380.8	20154.4	39048.9	1155.32	1847.04	15454.5	1728.76	2497	4536.53	9844.56	13246.1	12821.8	16971.4	16888.9	13954.5	499000	443000	491000	485000	479500
122	Metanephrine		221	0	100		0		198.1	7.15	407.11	322.793	141.593	379.974	640.162	378.326	81.6092	41.9372	135.533	76.1566	123.552	91.7576	343.805	51.0516	171.619	397.914	474.19	287.716	442.487	167.539	185.149	91.4286	157.778	208.876	27100	28300	25600	25400	26600
123	Methionine		222	0	100		0		150.1	8.01	80619.3	180501	70132.7	157895	93261.5	116482	148276	244503	114213	134520	151351	158573	244328	208413	381375	283159	250900	273635	327979	282199	162871	265143	320000	271638	12800000	10300000	12000000	13500000	12150000
124	Methylmalonate		223	0	100		0		117	11	52178.9	137022	96460.2	87291.4	88948.8	92380.3	39846.7	43874.3	43502.5	2.94801	307.722	25506.9	2.94801	2.94801	2.94801	1216.1	57.623	256.512	248.705	391.099	712.871	657.143	612.593	524.482	4560000	4340000	4460000	4580000	4485000
125	Mevalonate		224	0	100		0		147.1	3.92	658.257	1343.87	573.009	965.34	452.83	798.662	7049.81	7172.77	5634.52	8362.99	8030.89	7250.2	1745.2	1357.55	4279.38	1669.15	1824.73	2175.2	6476.68	5497.38	4757.43	4057.14	3318.52	4821.43	164000	172000	170000	189000	173750
126	m-Hydroxyphenylpyruvic acid		225	0	100		0		179	3.21	18.3486	49.2754	5.89602	20.5392	14.4205	21.6959	61.3027	139.791	81.2183	38.0783	41.3127	72.3405	410.122	30.5927	1290.47	286.14	236.495	450.763	193.782	139.791	158.416	488	395.556	275.109	14900	12200	12100	12800	13000
127	NAD		226	0	100		0		662.1	12.2	61.2385	337.286	159.292	211.81	100.674	174.06	143.295	307.33	487.817	246.975	144.015	265.887	195.462	346.08	259.424	222.057	211.285	246.861	469.948	111.518	369.802	305.143	316.296	314.542	5130	6400	6000	5870	5850
128	NADH		227	0	100		0		664.1	11.7	18.3486	28.195	29.5354	82.1566	7.18329	33.0838	2.94801	56.0209	54.3147	18.968	41.3127	34.7129	18.6736	40.9178	59.2018	23.845	89.6759	46.4628	193.264	27.9058	264.356	213.714	157.778	171.404	5340	4670	4270	4070	4587.5
129	NADP		228	0	100		0		742.1	3.08	2.94801	2.94801	5.89602	6.84211	2.94801	4.31643	2.94801	2.94801	2.94801	2.94801	20.5792	6.47424	2.94801	2.94801	2.94801	2.94801	2.94801	2.94801	2.94801	2.94801	2.94801	2.94801	2.94801	2.94801	2.94801	2.94801	2.94801	2.94801	2.94801
130	NADPH		229	0	100		0		744.1	5.45	2.94801	2.94801	2.94801	2.94801	2.94801	2.94801	40.9962	56.0209	2.94801	18.968	2.94801	24.3762	2.94801	2.94801	2.94801	2.94801	12.8451	4.92743	2.94801	2.94801	2.94801	2.94801	2.94801	2.94801	2.94801	2.94801	2.94801	2.94801	2.94801
131	Neopterin		230	0	100		0		252.1	17	2.94801	2.94801	11.8363	13.7356	2.94801	6.88317	2.94801	2.94801	81.2183	2.94801	20.5792	22.1283	9.30192	20.4589	2.94801	2.94801	12.8451	9.70039	55.4404	27.9058	2.94801	2.94801	2.94801	18.438	2.94801	2.94801	2.94801	2.94801	2.94801
132	Niacinamide		231	0	100		0		123	3.37	427752	475626	415929	449294	487871	451294	1.13793e+06	1.50785e+06	1.30964e+06	982206	1.07722e+06	1.20297e+06	647469	694073	802661	560358	490996	639111	1.62176e+06	1.72775e+06	1.39109e+06	1.61714e+06	1.92593e+06	1.65673e+06	39300000	37700000	39100000	38900000	38750000
133	Nicotinate ribonucleotide		232	0	100		0		334	12.4	1651.38	1646.9	1068.58	1951.22	870.62	1437.74	4789.27	8848.17	5431.47	3341.64	5212.36	5524.58	2425.83	3365.2	4545.45	2876.3	2304.92	3103.54	82.9016	8272.25	9257.43	8514.29	13851.9	7995.74	175000	160000	159000	182000	169000
134	Nicotinic acid		233	0	100		0		122	5.98	1490.83	4216.07	1194.69	3055.2	1469	2285.16	9885.06	45235.6	44314.7	129537	66795.4	59153.6	5863.87	6577.44	9423.5	4798.81	1019.21	5536.57	5062.18	10209.4	25247.5	9771.43	355.556	10129.2	539000	501000	474000	572000	521500
135	OMP		234	0	100		0		367	2.06	251.147	133.07	100.332	20.5392	93.531	119.724	448.276	418.848	837.563	322.776	679.537	541.4	37.1728	91.7782	223.947	71.535	128.451	110.577	387.047	586.387	158.416	794.286	514.074	488.042	13500	12300	13300	10700	12450
136	Ornithine		235	0	100		0		133.1	13.9	91.7431	309.618	82.6327	14890.9	136.119	3102.2	570.881	265.445	338.579	608.541	575.29	471.747	237.347	91.7782	94.6785	233.979	76.8307	146.923	137.824	335.079	211.386	1160	474.074	463.673	1820000	1640000	1790000	1690000	1735000
137	Orotate		236	0	100		0		155	6.33	568.807	1011.86	513.274	1347.88	644.205	817.205	2015.33	2879.58	1192.89	2042.7	2050.19	2036.14	1373.47	1009.56	769.401	1359.17	806.723	1063.66	2352.33	727.749	2168.32	988.571	1066.67	1460.73	68300	50200	54700	52900	56525
138	Oxalate		237	0	100		0		89	12.1	1095.18	794.466	1227.88	1047.5	1617.25	1156.45	3659	5287.96	6345.18	3950.18	4131.27	4674.72	1630.02	1673.04	2064.3	1137.11	1031.21	1507.14	3554.4	6020.94	5247.52	7657.14	9777.78	6451.56	54400	55000	43200	43200	48950
139	Oxaloacetate		238	0	100		0		131	11.3	225.917	436.1	613.938	273.427	471.698	404.216	1678.16	3717.28	338.579	818.505	463.32	1403.17	410.122	428.298	390.244	421.759	410.564	412.197	595.855	447.12	737.624	611.429	1385.19	755.443	79000	92800	79200	77600	82150
140	Oxidized glutathione		239	0	100		0		611.2	12.3	685.78	2081.69	932.522	3632.86	2843.67	2035.3	18275.9	21466	27411.2	39145.9	37683.4	28796.5	23560.2	39961.8	59201.8	35171.4	50180.1	41615	53886	75392.7	62871.3	97142.9	66963	71251.2	165000	164000	198000	153000	170000
141	Oxoglutaric acid		240	0	100		0		145.1	11.7	4552.75	7140.97	1117.26	4454.43	2169.81	3887.04	16168.6	25078.5	8629.44	871.886	7799.23	11709.5	14642.2	12562.1	18802.7	12861.4	12364.9	14246.7	40000	21937.2	16633.7	45657.1	19259.3	28697.4	1020000	904000	1190000	952000	1016500
142	Pantothenate		241	0	100		0		218.1	7.21	19495.4	24242.4	20685.8	37355.6	7991.91	21954.2	9540.23	16806.3	10862.9	12206.4	11853.3	12253.8	59336.8	23518.2	29046.6	47541	20648.3	36018.2	30725.4	25759.2	16881.2	22742.9	21703.7	23562.5	2010000	1860000	2240000	2440000	2137500
143	PEP		242	0	100		0		167	12.1	354.358	505.929	366.15	225.931	222.372	334.948	1574.71	3267.02	3304.57	1309.61	1069.5	2105.08	828.97	887.189	1844.79	731.744	537.815	966.102	1865.28	3031.41	1925.74	5182.86	5970.37	3595.13	51600	56000	49600	65100	55575
144	PGE2		243	0	100		0		351.2	3.14	220.183	505.929	173.673	887.035	258.76	409.116	3701.15	4890.05	8324.87	5053.38	2142.86	4822.46	93.1937	1931.17	35.4767	39.7914	420.168	503.959	12228	4120.42	10396	11428.6	7629.63	9160.53	126000	105000	107000	132000	117500
145	Phenylalanine		244	0	100		0		166.1	6.88	355505	451910	344027	414634	455526	404320	858238	1.45026e+06	847716	882562	1.05405e+06	1.01857e+06	603839	642447	749446	549925	452581	599648	1.66321e+06	1.42932e+06	1.00495e+06	1.30857e+06	1.44444e+06	1.3701e+06	37100000	33700000	34400000	35500000	35175000
146	Phosphoethanolamine		245	0	100		0		142	12.4	3933.49	8801.05	3915.93	12323.5	7601.08	7315.01	20574.7	20837.7	27918.8	28291.8	32625.5	26049.7	9738.22	17935	42793.8	19225	25570.2	23052.5	47098.4	47905.8	27425.7	57028.6	37777.8	43447.3	752000	755000	581000	734000	705500
147	Phosphotyrosine		246	0	100		0		260	12	893.349	3478.26	873.894	6341.46	2008.09	2719.01	1655.17	3769.63	1517.77	950.178	1938.22	1966.19	1972.08	1061.19	674.058	588.674	2400.96	1339.39	1549.22	1424.08	475.248	1125.71	434.815	1001.82	179000	191000	204000	202000	194000
148	PPA		247	0	100		0		163	2.47	91.8578	322.793	109.181	170.732	230.458	185.004	306.513	447.12	568.528	227.758	308.88	371.76	577.661	235.182	7516.63	1034.28	717.887	2016.33	1409.33	895.288	343.564	1462.86	851.852	992.578	45900	53400	44300	47500	47775
149	Proline		248	0	100		0		116.1	9.13	417431	566535	379425	535302	451482	470035	1.18008e+06	1.58115e+06	1.21827e+06	996441	1.1583e+06	1.22685e+06	774869	822180	929047	661699	524610	742481	2.10881e+06	1.72251e+06	1.69307e+06	1.77143e+06	2.17778e+06	1.89472e+06	47900000	45200000	45500000	44700000	45825000
150	Propionate		249	0	100		0		73	11	2.94801	14.0975	23.5619	13.7356	28.7062	16.6098	2.94801	2.94801	2.94801	2.94801	2.94801	2.94801	2.94801	2.94801	2.94801	2.94801	2.94801	2.94801	27.6166	27.9058	2.94801	2.94801	79.2593	28.1355	2.94801	2.94801	2.94801	2.94801	2.94801
151	Pyridoxal 5'-phosphate		250	0	100		0		246	7.99	2.94801	14.0975	2.94801	2.94801	2.94801	5.17791	2.94801	2.94801	2.94801	2.94801	2.94801	2.94801	9.30192	2.94801	2.94801	2.94801	2.94801	4.21879	2.94801	2.94801	2.94801	30.4571	2.94801	8.44984	2.94801	2.94801	2.94801	2.94801	2.94801
152	Pyridoxine		251	0	100		0		170.1	10.9	22935.8	18313.6	6238.94	35173.3	7951.48	18122.6	34482.8	34240.8	27512.7	21672.6	32586.9	30099.2	20767.9	20267.7	37915.7	30551.4	54861.9	32872.9	95336.8	35445	26831.7	32971.4	34518.5	45020.7	1720000	1750000	1700000	1860000	1757500
153	Pyruvate		252	0	100		0		87	18.8	61.2385	91.4361	129.425	164.313	86.3881	106.56	276.245	335.079	365.99	275.445	247.104	299.973	340.314	208.413	189.357	103.428	128.451	193.993	276.684	712.042	383.168	274.286	355.556	400.347	11500	10400	9470	8270	9910
154	Quinolinate		253	0	100		0		166	10.5	55.0459	333.333	348.451	441.592	301.887	296.062	2574.71	1534.03	1233.5	1519.57	2389.96	1850.36	102.443	1122.37	521.064	891.207	1992.8	925.977	3678.76	3701.57	3500	1554.29	1859.26	2858.77	16300	15500	11200	16000	14750
155	S-(5'-Adenosyl)-L-homocysteine		254	0	100		0		385.1	11.9	905.963	990.777	295.354	870.347	452.83	703.054	754.789	1926.7	812.183	1195.73	945.946	1127.07	586.387	1214.15	946.785	731.744	723.89	840.591	3015.54	2403.14	3435.64	2925.71	5651.85	3486.38	257000	203000	252000	168000	220000
156	Salicylurate		255	0	100		0		194.1	5.66	422.018	421.607	100.332	482.67	265.499	338.425	1532.57	1256.54	487.31	398.577	752.896	885.579	260.035	1223.71	691.796	652.757	339.736	633.607	1326.42	1005.24	2168.32	1097.14	2251.85	1569.79	27200	32000	25900	25600	27675
157	Serotonin		256	0	100		0		177.1	6.55	120413	246377	23.6726	228498	17.9245	119066	50.9579	139.791	54.3147	95.0178	82.2394	84.4641	37.1728	35.7553	47.2284	15.9463	19.2077	31.0621	165.803	83.7696	52.9703	91.4286	2.94801	79.3839	14000000	13700000	14600000	15000000	14325000
158	Sorbitol		257	0	100		0		181.1	6.44	1341.74	2094.86	1227.88	4133.5	956.873	1950.97	961.686	612.565	1081.22	814.947	451.737	784.431	8516.58	6003.82	11197.3	8614.01	12124.8	9291.32	5751.3	6439.79	4094.06	6342.86	3518.52	5229.3	274000	301000	310000	316000	300250
159	Spermidine		258	0	100		0		146.2	17.6	196.101	3465.09	2.94801	8292.68	2008.09	2792.98	26628.4	4246.07	25431.5	1348.75	2.94801	11531.5	1099.48	2.94801	1301.55	2.94801	650.66	611.517	2834.2	18795.8	11732.7	15600	3933.33	10579.2	89900	89700	87200	87000	88450
160	Spermine		259	0	100		0		203.2	11	899.083	2555.99	1382.74	1026.96	431.267	1259.21	735.632	181.675	1111.68	341.993	389.961	552.187	1331.59	305.927	1372.51	879.285	378.151	853.491	1989.64	1282.72	369.802	668.571	316.296	925.406	68800	67200	55000	70400	65350
161	Sucrose		260	0	100		0		341.1	6.49	1376.15	1989.46	1338.5	1925.55	1455.53	1617.03	3088.12	2178.01	3223.35	1861.21	1876.45	2445.43	2757.42	2256.21	3281.6	2295.08	2533.01	2624.66	6476.68	5549.74	618.812	6857.14	158.519	3932.18	226000	180000	177000	169000	188000
162	Taurine		261	0	100		0		126	8.79	313073	404480	240044	397946	326146	336338	750958	910995	832487	701068	861004	811302	401396	252390	596452	380030	331333	392320	1.02591e+06	963351	449505	897143	918519	850885	28500000	29300000	29500000	29800000	29275000
163	Taurochenodeoxycholate		262	0	100		0		498.3	3.05	45183.5	92885.4	40597.3	143774	142857	93059.5	7509.58	14764.4	4172.59	11067.6	7606.18	9024.07	51657.9	38049.7	3858.09	36363.6	27370.9	31460.1	1134.72	1240.84	1044.55	1325.71	2333.33	1415.83	3910000	4090000	3540000	3800000	3835000
164	Taurocholate		263	0	100		0		514.3	3.57	409404	815547	462389	790757	572776	610175	60536.4	109948	33705.6	120641	59459.5	76857.9	835951	216061	243902	508197	338535	428529	41295.3	16753.9	9108.91	30742.9	52444.4	30069.1	36300000	29600000	35800000	35300000	34250000
165	Thiamine pyrophosphate		264	0	100		0		423	12	6.11239	7.0224	2.94801	6.84211	2.94801	5.17458	20.4215	112.042	2.94801	18.968	20.5792	34.9917	18.6736	10.1912	2.94801	2.94801	12.8451	9.5212	2.94801	27.9058	2.94801	61.1429	2.94801	19.5785	2670	2600	2130	2300	2425
166	Threonine		265	0	100		0		120.1	11	19954.1	49143.6	20354	43902.4	29514.8	32573.8	47509.6	69109.9	36497.5	47686.8	53281.9	50817.1	100349	113958	100887	87332.3	56902.8	91885.8	127979	113613	127723	93142.9	97037	111899	4630000	3540000	3820000	4450000	4110000
167	Thymidine		266	0	100		0		243.1	3.85	275.229	534.914	56.0841	441.592	280.323	317.629	2984.67	3298.43	1583.76	1651.25	1482.63	2200.15	1638.74	1437.86	3658.54	1713.86	1236.49	1937.1	4010.36	3769.63	2485.15	2651.43	2251.85	3033.69	87800	87000	100000	86200	90250
168	Thymine		267	0	100		0		127	10.1	30.6193	35.1779	23.6726	17.0732	32.345	27.7776	122.605	111.518	135.533	133.096	41.3127	108.813	27.9232	71.5105	47.2284	31.7437	32.0528	42.0917	304.145	223.56	79.2079	305.143	158.519	214.115	181000	158000	180000	179000	174500
169	Trimethylamine-N-oxide		268	0	100		0		76.1	11.2	10229.4	13965.7	7035.4	34018	14959.6	16041.6	29578.5	41780.1	75634.5	70462.6	37220.1	50935.2	2076.79	23135.8	1088.69	7988.08	17887.2	10435.3	10984.5	5811.52	92574.3	4725.71	12518.5	25322.9	1300000	1180000	1290000	1510000	1320000
170	Tryptophan		269	0	100		0		205.1	6.86	137615	229249	107965	191271	123315	157883	179310	258115	163452	170107	182239	190645	336824	302103	470067	371088	325330	361082	452850	294764	281188	299429	283704	322387	17300000	14000000	16900000	18000000	16550000
171	Tyrosine		270	0	100		0		182.1	8.6	57568.8	117787	51991.2	96534	75741.2	79924.4	84291.2	141885	79187.8	86121	107722	99841.4	150436	181836	207982	214605	169268	184825	177202	136649	131683	144000	125926	143092	9370000	7860000	7980000	8770000	8495000
172	UDP		271	0	100		0		403	12.1	1857.8	2332.02	737.832	1630.3	791.105	1469.81	3107.28	3492.15	3035.53	1387.9	2038.61	2612.29	1275.74	1244.74	2070.95	588.674	960.384	1228.1	4533.68	1759.16	1321.78	2411.43	2725.93	2550.4	373000	463000	351000	344000	382750
173	UDP-glucose		272	0	100		0		565.1	12.1	4139.91	9130.43	3362.83	12208	5646.9	6897.61	35478.9	39424.1	24720.8	11601.4	25521.2	27349.3	3472.95	6634.8	19223.9	3368.11	6158.46	7771.65	35233.2	23246.1	14851.5	25028.6	21555.6	23983	244000	342000	343000	334000	315750
174	UDP-glucuronate		273	0	100		0		579	12.3	532.11	1383.4	761.062	1232.35	913.747	964.533	3149.43	5198.95	6091.37	3551.6	3938.22	4385.91	652.705	2466.54	4833.7	612.519	1788.72	2070.84	8445.6	5083.77	5396.04	7085.71	5925.93	6387.41	34700	43200	40600	41600	40025
175	UMP		274	0	100		0		323	12	42316.5	53359.7	24336.3	45186.1	28167.1	38673.1	75095.8	58638.7	90862.9	58363	55984.6	67789	39092.5	52963.7	88470.1	41132.6	48379.4	54007.6	92746.1	90052.4	64356.4	84571.4	93333.3	85011.9	3890000	4530000	4350000	5240000	4502500
176	Uracil		275	0	100		0		113	3.87	10906	13702.2	9369.47	23234.9	8355.8	13113.7	26092	29842.9	23502.5	22811.4	28069.5	26063.7	30541	16348	24833.7	26527.6	11344.5	21919	41554.4	25759.2	20792.1	22685.7	27777.8	27713.8	1110000	1140000	1140000	1250000	1160000
177	Urate		276	0	100		0		167	9.49	15940.4	7417.65	5652.65	8729.14	2466.31	8041.22	6015.33	3492.15	8477.16	3341.64	3440.15	4953.28	9144.85	24856.6	17516.6	10700.4	11572.6	14758.2	13057	111.518	52.9703	152.571	79.2593	2690.66	923000	743000	824000	911000	850250
178	Ureidopropionic acid		277	0	100		0		133.1	10.9	2155.96	2951.25	2555.31	3453.15	3018.87	2826.91	6015.33	7225.13	7106.6	5587.19	6911.2	6569.09	3368.24	3460.8	3636.36	3517.14	3193.28	3435.16	5854.92	6753.93	4094.06	5411.43	6800	5782.87	232000	212000	205000	234000	220750
179	Uridine		278	0	100		0		245	5.17	9965.6	15151.5	9347.35	19897.3	11212.9	13114.9	22835.2	45340.3	15786.8	37722.4	25675.7	29472.1	39965.1	24283	31707.3	45156.5	38295.3	35881.4	24145.1	27382.2	23415.8	10628.6	24370.4	21988.4	2280000	1720000	1940000	2080000	2005000
180	UTP		279	0	100		0		483	6.39	12.2706	2.94801	2.94801	2.94801	14.4205	7.10703	2.94801	27.9058	2.94801	2.94801	2.94801	7.93956	37.1728	2.94801	11.8182	2.94801	2.94801	11.567	2.94801	2.94801	2.94801	30.4571	39.4815	15.7565	2.94801	2.94801	2.94801	2.94801	2.94801
181	Valine		280	0	100		0		118.1	8.77	267202	351779	167035	322208	315364	284718	264368	570681	363959	412811	467181	415800	438045	449331	552106	350224	272509	412443	740933	801047	752475	680000	657778	726447	32700000	29500000	29000000	28500000	29925000
182	Xanthine		281	0	100		0		151	5.96	96100.9	120026	74557.5	154044	56603.8	100266	75478.9	93717.3	73604.1	75089	85714.3	80720.7	107504	93499	97339.2	133532	71548.6	100685	96373.1	73822	60891.1	68000	73777.8	74572.8	7970000	6590000	7380000	8010000	7487500
183	Xanthine		282	0	100		0		153	5.96	46215.6	49538.9	30973.5	69704.7	25067.4	44300	28965.5	43874.3	31776.6	35551.6	34285.7	34890.8	49040.1	43212.2	45232.8	60655.7	36734.7	46975.1	40466.3	29842.9	23613.9	28457.1	30074.1	30490.9	3350000	2740000	3140000	3520000	3187500
184	Xanthosine		283	0	100		0		285.1	6.14	8314.22	14624.5	8053.1	17715	5458.22	10833	3272.03	3769.63	3304.57	2391.46	4555.98	3458.74	5008.73	3154.88	2882.48	6646.8	1788.72	3896.32	3316.06	1649.21	1638.61	1525.71	1777.78	1981.48	506000	416000	477000	490000	472250
185	Xanthurenate		284	0	100		0		204	4.97	6.11239	112.516	17.6991	27.3427	35.9838	39.9309	40.9962	56.0209	54.3147	38.0783	41.3127	46.1446	167.539	265.774	319.29	286.14	205.282	248.805	138.342	195.812	26.3861	30.4571	118.519	101.903	6740	6400	7470	7470	7020
186	XMP		285	0	100		0		363	12.1	691.514	1844.53	897.124	2118.1	1347.71	1379.8	9080.46	12513.1	9949.24	6654.8	11312.7	9902.07	1610.82	2829.83	4833.7	2190.76	3565.43	3006.11	12797.9	9371.73	8910.89	11085.7	11629.6	10759.2	251000	264000	223000	224000	240500
187	γ-Aminobutyrate		286	0	100		0		104.1	11.7	32798.2	54677.2	23119.5	43260.6	47978.4	40366.8	60919.5	76963.4	47309.6	70106.8	47490.3	60557.9	110646	125048	189800	114903	99880	128055	388083	350785	201485	433143	207407	316181	5710000	4860000	5040000	5840000	5362500
188	isocitrate		287	0	100		0		100	1	2131.47	5117.19	3836.98	1775.19	4463.94	3464.95	3851.61	2093.02	898.618	878.378	2193.68	1983.06	1246.46	524.558	39.9225	2.94801	1157.46	594.271	530.516	1753.36	1077.52	432.95	670	892.87	3060	3090	3540	3300	3247.5
189	S-adenosyl-L-methionine		288	0	100		0		101	1	984.064	4921.88	2186.88	2674.42	4678.36	3089.12	18903.2	4726.74	8433.18	5225.23	6047.43	8667.16	2646.46	1738.7	139.535	20.8925	3415.13	1592.15	3427.23	10000	5581.4	8390.8	10250	7529.89	3090	3090	3110	3030	3080
190	lactate		289	0	100		0		102	1	278884	503906	318091	298450	662768	412420	838710	387209	520737	463964	403162	522756	458586	223969	298.45	32657.2	437628	230628	488263	556054	387597	440613	650000	504505	28600	24400	27800	24700	26375
191	succinate		290	0	100		0		103	1	87649.4	296875	181113	99612.4	294347	191919	303226	91860.5	43640.6	59909.9	101581	120044	64444.4	36149.3	1534.88	1929.01	60736.2	32958.8	28497.7	62780.3	50775.2	30651.3	53500	45240.9	105000	111000	88500	91500	99000
